# Supplementary material for: Aging Changes the Neural Correlates of Social Perspective Taking and Moral Judgements
Source: Research Square preprint supplement (doi:10.21203/rs.3.rs-6859135/v1), 2025-10-03
Supplement: Supplementary file 1 [file 6b715179c5dd8c7df4fdf575.docx]

**Supplementary materials**

**Details in Dispositional Justice Sensitivity (JSI)**

The JSI is a self-reported psychometric measure used to assess four perspectives of justice sensitivity and produces four scores between 1 (do not agree at all) and 6 (strongly agree), which index an individual’s disposition when reacting to unfair situations. Because three perspectives of observer, beneficiary, and perpetrator are closely related, these scores are often collapsed to create a measure of other-oriented sensitivity (Edele et al., 2013). Although related, self-orientation and other-orientation represent reliably distinct constructs that can exert independent and opposing influences on behavior (Gollwitzer et al., 2009). Self-orientation tends be associated with higher neuroticism and lower agreeableness, whereas other-oriented justice sensitivity is related to high agreeableness, conscientiousness, and empathy (Schmitt et al., 2010).

**Details in Utilitarian judgments on moral dilemmas**

Based on previous work (Chen et al., 2016; Greene et al., 2009) (<http://www.cell.com/neuron/supplemental/S0896-6273(04)00634-8>), forty-eight moral dilemmas were selected in order to make two versions of the moral judgment task balanced on the emotional intensity (Koenigs et al., 2007). Each version consisted of 12 dilemmas with six personal and six impersonal dilemmas. Personal dilemmas included harm through direct physical contact (pushing a stranger) such as the trolley dilemma, whereas the impersonal dilemmas involved indirect harm (e.g., flipping a switch). Personal dilemmas were further divided into dilemmas in which the death of or harm to the victim is inevitable or evitable. Moral permissibility judgments are higher for actions that propose inevitable harm compared to evitable harm. Dilemmas were translated from English to Chinese, and then translated back from Chinese to English and checked for consistency by a native English speaker. Participants read and responded to the dilemmas at their own pace.

**Details in Implicit Moral Attitudes (mIAT)**

The mIAT was modified with animations and words for the stimuli. Verbal stimuli included 26 extremely pleasant and 26 extremely unpleasant words, selected from high-frequency Chinese words . The animation stimuli comprised 47 clips depicting everyday dyadic interactions. In each animation, the action is either characterized as a moral or immoral based on an outcome of personal assistance or harm (Yoder & Decety, 2014). The mIAT followed the experimental design proposed by Greenwald and colleagues (1998), including the five discrimination blocks.

Block 1 began with an "initial target-concept discrimination". Participants categorized the clips as moral (right response key) or immoral (left response key).

Block 2 was termed "attribute discrimination". Participants categorized words as negative (right response key) or positive (left response key).

Block 3 of "target-concept discrimination" combined block 1 and 2 with clips and words randomly presented in alternate trials. Moral clips shared a right response key with negative words, and immoral clips shared a left response key with positive words (moral-negative/immoral-positive).

Block 4 was known as "reversed target-concept discrimination". Participants learned a reversed response assignment for block 1 and judged if clips were moral (left response key) or immoral (right response key).

Block 5 combined block 2 and 4. Immoral clips shared a right response key with negative words, and moral clips shared a left response key with positive words (immoral-negative/moral-positive).

Two block sequences (12345 and 42513) were counterbalanced to control the sequential effect. Half of participants experienced the incongruent block first, and the other half completed the congruence block first. Blocks 1, 2, and 4 contained 20 trials each, whereas blocks 3 and 5 (incongruent and congruent blocks) contained 40 trials each. Words and/or clips within each block were presented in random order. Each trial consisted of a 1000-ms presentation of a fixation followed by a stimulus. The stimuli were viewed on a computer and administered using E-Prime ver. 2.0 software (Psychology Software Tools, Pittsburgh, PA, USA). Participants were instructed to classify each word or clip as fast and accurately as possible. There were ten practice trials before participants started block 3 or block 5. The accuracy rate and reaction time (RT) during block 3 and 5 were recorded.

The mIAT performance, as indexed by D scores, represents implicit moral attitudes. The D score was calculated by subtracting the mean RT of congruent (immoral-negative) blocks from that of incongruent (immoral-positive) blocks and dividing it by the pooled SD across the two blocks (Nosek et al., 2014). Higher D scores might come from higher RTs for incongruent blocks or lower RTs for congruent blocks.

Because the IAT relies on RT differentials, which are highly sensitive to outliers and extreme values, RTs exceeding two times the SD from the subject means were excluded from the set of valid responses (outliers accounted for fewer than 3% of all the responses). Additionally, extreme responses – either very slow or very fast – can indicate inattention to the task performance rules. Exclusion criteria were applied for RTs faster than a 300-ms and slower than a 6000-ms cut-off boundary response latency (extreme responses accounted for fewer than 1% of all responses) (Nosek et al., 2014).

**Details in fMRI acquisition, data processing and analysis**

Participants underwent fMRI scanning in which stimuli were presented with the E-prime software (Psychology Software Tools) and a MRI compatible goggle (VisualStim Controller, Resonance Technology Inc.) in a three-level within-subject design of moral valence (helping vs. neutral vs. harming). During fMRI scanning, in order to highlight the moral motivation beyond passive observations, we designed a button-trigger task, in which participants witnessed the image of a morally laden scenario and pressed the button in order to trigger the presentation of two successive images. Participants were instructed to imagine themselves being the agent of the action that carried different moral consequences, including as a helper, perpetrator, or agent carrying out neutral actions.

Scanning followed a mixed design (19.1 s ON/ 13.2 ± 4.4 s OFF) and had two runs. Each run consisted of six ON blocks (two harming, two helping, and two neutral scenarios) intermixed with six OFF blocks. Each ON block consisted of five trials (with a duration of 2200 ms each), and five inter-stimulus intervals (with a duration of 2200 ms each) with a fixation cross presented against a gray background. The sequence of scenarios (harming, helping, and neutral) was pseudo-randomized within each run. The order of runs was counterbalanced across participants.

Scanning was performed with a 3T Siemens Magnetom Trio-Tim magnet. For functional changes, changes in blood oxygenation level-dependent (BOLD) T2*-weighted MR signals were collected along the anterior commissure-posterior commissure (AC–PC) plane using a gradient echo-planar imaging (EPI) sequence (TR = 2200 ms, TE = 30 ms, field of view (FOV) = 220 mm, flip angle = 90°, matrix = 64 × 64, 36 transversal slices, voxel size = 3.4 × 3.4 × 3.0 mm3, no gap). High-resolution structural T1-weighted images were acquired using a 3D magnetization-prepared rapid gradient echo sequence (TR = 2530 ms, TE = 3.5 ms, FOV = 256 mm, flip angle = 7°, slice thickness = 1 mm, matrix = 256 × 256 mm2, no gap).

Functional images were processed with SPM12 (Wellcome Department of Imaging Neuroscience, London, UK) in MATLAB 9.0 (MathWorks Inc., Sherborn, MA, USA). Structural T1 images were co-registered to the mean functional images, and a skull-stripped image was created from segmented gray matter, white matter, and cerebrospinal fluid (CSF) images. These segmented images were combined to create a subject-specific brain template using the “New Segment” and DARTEL. EPI images were realigned and filtered (with a 128-s cutoff), then co-registered to these brain templates, normalized to the Montreal Neurological Institute (MNI) space, and smoothed (8 mm full width at half maximum (FWHM)). The hemodynamic response function was time-locked to the stimulus onset.

A two-level approach for mixed-design fMRI data was adopted. A voxel-by-voxel multiple regression analysis of expected signal changes for each of the three block categories (harming vs. helping vs. neutral actions), constructed using the hemodynamic response function, was applied to the preprocessed images in each participant. Individual subject data were analyzed using a fixed-effects model. Boxcar regressors, which represented the occurrence of each of the three block categories, were used to model condition effects at the subject level. At the first level of analysis, three conditions (harming, helping, and neutral) were separately modeled with a duration of the length of each ON block beginning at the onset of the first action image. The null event (fixation) was modeled with a duration 13.2 ± 4.4 s. Linear contrasts were applied to obtain parameter estimates. First-level contrast images of harming vs. neutral were derived to index the neuro-hemodynamic activity specific to harming actions, while first-level contrast images of helping vs. neutral were calculated to represent the neuro-hemodynamic activity specific to helping actions. Movement parameters from the realignment output were included as regressors of no interest. The resulting first-level contrast images were then entered into an analysis of variance (ANOVA): 2 (age: young vs. old) × 2 (scenario: harming vs. helping). Whole-brain activations were corrected for the multiple-comparisons family-wise error (FWE) rate at *p* < 0.05 (with a thresholded at *p* < 0.001, and cluster extent of at least 20 contiguous voxels, FWE at *p* < 0.05).

To explore the extent to which aging moderated neural responses involved in cognitive and affective networks of morality, activities from four regions of interest (ROIs) of the cognitive network [dlPFC (x 42, y 30, z 26), dmPFC (0, 54, 36), TPJ (56, -50, 18), and OFC (-26, 48, -14)] and four ROIs of the affective network [amygdala (-22, -2, -24), insula (-30, 20, 4), aMCC (-16, 6, 38), and temporal pole (-42, 12, -22)] were extracted for further analyses. ROIs were centered on the coordinates determined on the basis of neuroanatomical atlases and meta-analyses (Bzdok et al., 2012) and previous fMRI studies of moral evaluations using similar stimuli (Chen et al., 2022; Cheng et al., 2021). ROI data were extracted and reported for significant contrast image peaks within 10 mm of these a priori coordinates. Data extraction for the ROI analyses was performed using the MarsBaR toolbox (http://marsbar.sourceforge.net/) implemented in SPM12.

**Table s1:** **Brain regions showing significant blood oxygenation level-dependent (BOLD) activities in response to harming vs. helping behaviors.** Pooled group results (harming vs. helping) were conducted for all participants (*N* = 63). Groupwise comparisons were conducted between older (*n* = 32) and younger adults (*n* = 31). All clusters were significant at a voxel-wise family-wise error (FWE)-corrected *p* < 0.05, except those marked with an asterisk, which were taken from a priori predefined regions of interest (ROIs) and were significant at an uncorrected *p* < 0.05. Abbreviations: R, right; L, left; dmPFC, dorsomedial prefrontal cortex; dlPFC, dorsolateral prefrontal cortex; TPJ, temporoparietal junction; OFC, orbitofrontal cortex; aMCC, anterior midcingulate cortex; N.S., non-significant.

|  |  | MNI coordinates | | |  |
| --- | --- | --- | --- | --- | --- |
| Brain region | Side | x | y | z | *Peak T* |
| **Harming > Helping** | | | | | |
| dmPFC | R | 8 | 30 | 62 | 4.22 |
|  | L | -2 | 40 | 54 | 3.73 |
| dlPFC | L | -52 | 12 | 24 | 4.09 |
|  | L | -52 | 40 | 8 | 4.06 |
|  | R | 60 | 28 | 18 | 4.05 |
| TPJ | L | -58 | -32 | 16 | 3.45 |
|  | L | -64 | -36 | 24 | 3.74 |
| OFC | L | -28 | 32 | -14 | 3.75 |
| Insula | R | 42 | -8 | 0 | 4.67 |
|  | L | -38 | -8 | -6 | 3.59 |
| aMCC | R | 4 | -6 | 44 | 3.87 |
| Temporal pole | R | 46 | 10 | -18 | 4.93 |
|  | L | -48 | 20 | -18 | 3.93 |
| Hippocampus | R | 38 | -22 | -16 | 4.09 |
|  | L | -36 | -20 | -18 | 3.21 |
|  | L | -28 | -40 | 0 | 3.69 |
| Caudate | R | 16 | -6 | 22 | 3.87 |
|  | L | -10 | 16 | 12 | 3.4 |
| Amygdala | R | 30 | -4 | -20 | 3.05* |
|  | L | -30 | -4 | -20 | 3.36* |
| Postcentral gyrus | R | 26 | -44 | 70 | 4.94 |
|  | L | -18 | -36 | 74 | 4.56 |
| Precentral gyrus | R | 12 | -22 | 76 | 3.71 |
| Inferior Occipital cortex | L | -42 | -62 | -12 | 4.04 |
|  | L | -22 | -84 | 32 | 3.54 |
| Middle occipital cortex | R | 44 | -78 | 22 | 3.95 |
| **Help > Harming** | | | | | |
| N.S. |  |  |  |  |  |
| **Old > Young** | | | | | |
| N.S. |  |  |  |  |  |
| **Young > Old** | | | | | |
| TPJ | L | -54 | -48 | 12 | 2.46* |
| **Old > Young｜Harming vs. Helping** | | | | | |
| dlPFC | L | -58 | 0 | 24 | 2.67* |
| dmPFC | R | 2 | 64 | 24 | 2.45* |
| OFC | L | -38 | 54 | -8 | 2.75* |
|  | R | 36 | 48 | -10 | 2.51* |
| TPJ | L | -56 | -56 | 14 | 1.9* |
|  | R | 58 | -50 | 24 | 1.74* |
| **Young > Old｜Harming vs. Helping** | | | | | |
| Insula | R | 38 | 2 | 12 | 2.13* |
|  | L | -42 | 0 | 8 | 2.05* |
| aMCC | R | 4 | -2 | 40 | 2.84* |
|  | L | -2 | -2 | 42 | 2.74* |

**Table s2: Region of interest (ROI) correlation results between hemodynamic responses and behavioral assessments in older and younger adults when executing harming behavior.**

| Behavioral | Young adults | | | | | | | | | | | | Old adults | | | | | |
| --- | --- | --- | --- | --- | --- | --- | --- | --- | --- | --- | --- | --- | --- | --- | --- | --- | --- | --- |
| assessments |  | | MNI coordinates | | | | | |  | |  | | MNI coordinates | | | |  |  |
|  | Side | | x | | y | | z | | *Peak T* | | *p* | | x | | y | z | *Peak T* | *p* |
| **D-score correlations** | | | | | | | | | | |  | | | | | | | |
| OFC | R | | 42 | | 54 | | -12 | | 2.51 | | 0.009 | | 32 | | 52 | -10 | -2.66 | 0.006 |
| Amygdala | L | | -28 | | 0 | | -16 | | 2.35 | | 0.013 | | -28 | | 0 | -16 | -2.67 | 0.007 |
| Temporal pole | L | | -50 | | 12 | | -20 | | 3.26 | | 0.002 | | -50 | | 12 | -20 | -3.41 | < 0.001 |
|  | R | | 54 | | 22 | | -26 | | 3.1 | | 0.002 | | 44 | | 22 | -28 | -2.64 | 0.007 |
| **JSI-self correlations** | | | | | | | | | | |  | | | | | | | |
| TPJ | | R | | 58 | | -52 | | 12 | | -2.97 | | 0.003 | | ns | | | | |
| dlPFC | | R | | 44 | | 22 | | 24 | | -2.87 | | 0.004 | | ns | | | | |
| **Blame rating correlations** | | | | | | | | | | |  | | | | | | | |
| Temporal pole | | R | | 44 | | 8 | | -24 | | 3.15 | | .002 | | ns | | | | |

Abbreviations: MNI, Montreal Neurologic Institute; R, right; L, left; OFC, orbitofrontal cortex; TPJ, temporoparietal junction; dlPFC, dorsolateral prefrontal cortex; ns, not significant.

**Figure s1.** Experimental procedures.


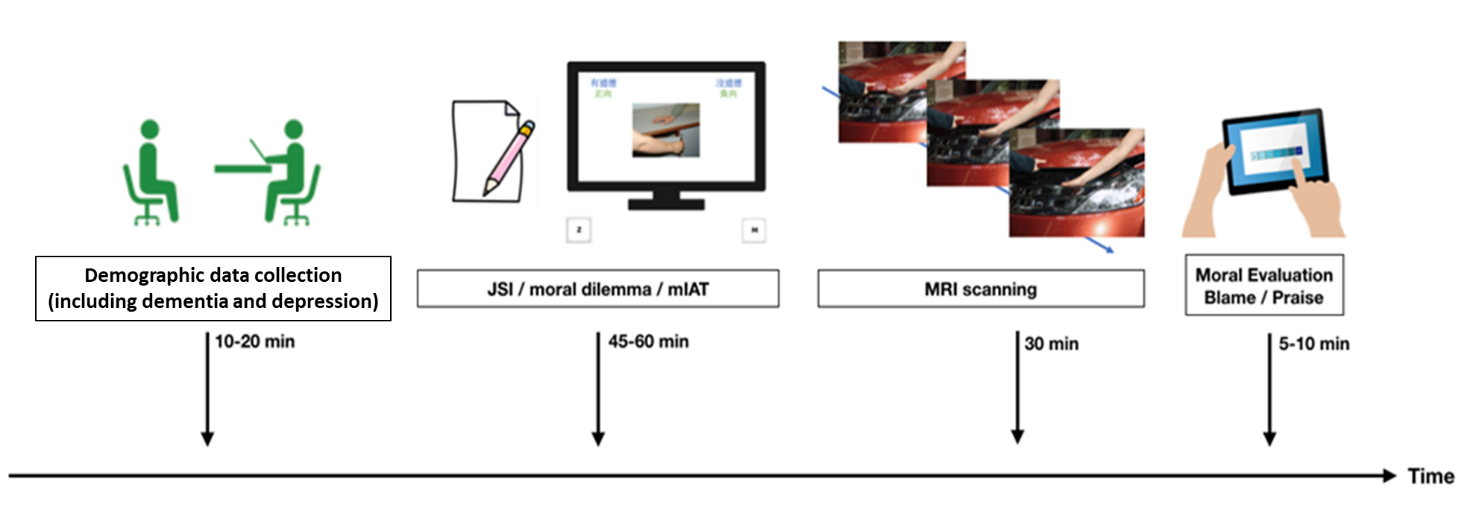


**REFERENCES of the supplementary materials**

Bzdok, D., Schilbach, L., Vogeley, K., Schneider, K., Laird, A. R., Langner, R., & Eickhoff, S. B. (2012). Parsing the neural correlates of moral cognition: ALE meta-analysis on morality, theory of mind, and empathy. *Brain Struct Funct*, *217*(4), 783-796. <https://doi.org/10.1007/s00429-012-0380-y>

Chen, C., Decety, J., Huang, P. C., Chen, C. Y., & Cheng, Y. (2016). Testosterone administration in females modulates moral judgment and patterns of brain activation and functional connectivity. *Human Brain Mapping*, *37*(10), 3417-3430.

Chen, C., Martínez, R. M., Chen, Y. C., Fan, Y. T., & Cheng, Y. (2022). The neural mediators of moral attitudes and behaviors. *Behav Brain Res*, *430*, 113934. <https://doi.org/10.1016/j.bbr.2022.113934>

Cheng, Y., Chou, J., Martínez, R. M., Fan, Y.-T., & Chen, C. (2021). Psychopathic traits mediate guilt-related anterior midcingulate activity under authority pressure. *Scientific reports*, *11*(1), 1-11.

Edele, A., Dziobek, I., & Keller, M. (2013). Explaining altruistic sharing in the dictator game: the role of affective empathy, cognitive empathy, and justice sensitivity. *Learning and Individual Differences*, *24*. <https://doi.org/https://doi.org/10.1016/j.lindif.2012.12.020>

Gollwitzer, M., Rothmund, T., Pfeiffer, A., & Ensenbach, C. (2009). Why and when justice sensitivty leads to pro- and antisocial behavior. *Journal of Research in Personality*, *43*(6), 999-1005. <https://doi.org/https://doi.org/10.1016/j.jrp.2009.07.003>

Greene, J. D., Cushman, F. A., Stewart, L. E., Lowenberg, K., Nystrom, L. E., & Cohen, J. D. (2009). Pushing moral buttons: The interaction between personal force and intention in moral judgment. *Cognition*, *111*(3), 364-371.

Greenwald, A. G., McGhee, D. E., & Schwartz, J. L. (1998). Measuring individual differences in implicit cognition: the implicit association test. *J Pers Soc Psychol*, *74*(6), 1464-1480. <http://www.ncbi.nlm.nih.gov/pubmed/9654756>

Koenigs, M., Young, L., Adolphs, R., Tranel, D., Cushman, F., Hauser, M., & Damasio, A. (2007). Damage to the prefrontal cortex increases utilitarian moral judgements. *Nature*, *446*(7138), 908-911. <https://doi.org/10.1038/nature05631>

Nosek, B. A., Bar-Anan, Y., Sriram, N., Axt, J., & Greenwald, A. G. (2014). Understanding and using the brief Implicit Association Test: recommended scoring procedures. *PLoS One*, *9*(12), e110938. <https://doi.org/10.1371/journal.pone.0110938>

Schmitt, M., Baumert, A., Gollwitzer, M., & Maes, J. (2010). The Justice Sensitivity Inventory: Factorial validity, location in the personality facet space, demorgraphic pattern, and normative data. *Social Justice Research*, *23*(2-3), 211-238. <https://doi.org/10.1007/s11211-010-0115-2>

Yoder, K. J., & Decety, J. (2014). The Good, the bad, and the just: justice sensitivity predicts neural response during moral evaluation of actions performed by others. *J Neurosci*, *34*(12), 4161-4166. <https://doi.org/10.1523/JNEUROSCI.4648-13.2014>
